# Supplementary material for: Bridge-tuned through-space charge transfer for TADF and HLCT emissions
Source: Royal Society of Chemistry journal article supplement (doi:10.1039/d4tc02682a), 2024-01-01

## Supporting Information

### **Bridge-tuned through-space charge transfer for TADF and HLCT emissions**

Tian Tian, Jiaqi Li, Dongxue Guo, and Houyu Zhang\*

*State key laboratory of supramolecular structure and materials,  
Institute of theoretical chemistry, College of Chemistry, Jilin university,*

*Changchun 130012, P.R. China*

\*Email: [hoyuzhang@jlu.edu.cn](mailto:hoyuzhang@jlu.edu.cn)

## Contents

**Table S1.** Calculated HOMO levels (eV) of molecule **Cz-XAN-TRZ** (XCT) with different DFT functionals with a fixed percentage of nonlocal Hartree-Fock exchange ( $\text{HF}_{\text{exc}}$ ).

**Table S2.** Calculated absorption wavelength ( $\lambda_{\text{abs}}$ : nm) and emission wavelength ( $\lambda_{\text{em}}$ : nm) of molecule **Cz-XAN-TRZ** (XCT) with different DFT functionals with a fixed percentage of nonlocal Hartree-Fock exchange ( $\text{HF}_{\text{exc}}$ ).

**Table S3.** HOMO and LUMO levels, HOMO-LUMO energy gaps (eV) of commonly used acceptors and donors in their ground states.

**Table S4.** Calculated vertical  $\Delta E_{\text{ST}}$  (eV) for the investigated molecules in this work.

**Table S5.** Geometrical parameters (in Å or degree) for **tBuCz-XAN-TRZ** and **tBuCz-AN-TRZ** in their ground and excited states.

**Figure S1.** Optimized ground-state structures and dihedral angles of the investigated molecules and molecules with only the donor or acceptor connected with the bridge.

**Figure S2.** Structural changes between two states with their RMSDs and the corresponding relative energy levels ( $S_0$ ,  $S_1$ ,  $T_1$ , and  $T_2$  are shown in gray, red, blue, and green, respectively).

**Figure S3.** Chemical structures with **tBuCz** as the donor (a); HOMO and LUMO levels, spatial distributions, HOMO-LUMO energy gaps, and overlap integrals ( $\beta$ ) (b); IGMH isosurfaces and charge transfer amount ( $q$ ) from donor to acceptor (c); color-filled TDM maps of the singlet and triplet states (d); NTO analysis of the singlet and triplet states for **tBuCz-XAN-TRZ** and **tBuCz-AN-TRZ** molecules (e).

**Table S1.** Calculated HOMO levels (eV) of molecule **Cz-XAN-TRZ** (XCT) with different DFT functionals with a fixed percentage of nonlocal Hartree-Fock exchange (HF<sub>exc</sub>).

|             | <b>B3LYP</b> | <b>PBE0</b>  | <b>PBE0-1/3</b> | <b>PBE38</b> | <b>Exp<sup>a</sup></b> |
|-------------|--------------|--------------|-----------------|--------------|------------------------|
|             | <b>20%</b>   | <b>25%</b>   | <b>33.33%</b>   | <b>37.5%</b> |                        |
| <b>HOMO</b> | <b>-5.45</b> | <b>-5.73</b> | <b>-6.14</b>    | <b>-6.21</b> | <b>-5.58</b>           |

<sup>a</sup> Experimental values obtained from ref. 45.

**Table S2.** Calculated absorption wavelength ( $\lambda_{\text{abs}}$ : nm) and emission wavelength ( $\lambda_{\text{em}}$ : nm) of molecule **Cz-XAN-TRZ** (XCT) with different DFT functionals with a fixed percentage of nonlocal Hartree-Fock exchange (HF<sub>exc</sub>).

|                        | <b>B3LYP</b> | <b>PBE0</b> | <b>PBE0-1/3</b> | <b>PBE38</b> | <b>Exp<sup>a</sup></b> |
|------------------------|--------------|-------------|-----------------|--------------|------------------------|
|                        | <b>20%</b>   | <b>25%</b>  | <b>33.33%</b>   | <b>37.5%</b> |                        |
| $\lambda_{\text{abs}}$ | <b>408</b>   | <b>382</b>  | <b>344</b>      | <b>328</b>   | <b>341</b>             |
| $\lambda_{\text{em}}$  | <b>484</b>   | <b>452</b>  | <b>407</b>      | <b>392</b>   | <b>419</b>             |

<sup>a</sup> Experimental values obtained from ref. 45.

**Table S3.** HOMO and LUMO levels, HOMO-LUMO energy gaps (eV) of commonly used acceptors and donors in their ground states.

| Mol.                                                                                                                                   | HOMO  | LUMO  | gap  |
|----------------------------------------------------------------------------------------------------------------------------------------|-------|-------|------|
| 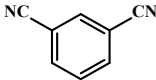<br><b>isophthalonitrile (IPN)</b>                    | -7.84 | -2.25 | 5.59 |
| <br><b>2,4-diphenyl-1,3,5-triazine (TRZ)</b>          | -6.73 | -1.91 | 4.82 |
| <br><b>4,6-diphenylpyrimidine (PM)</b>                | -6.52 | -1.72 | 4.80 |
| <br><b>9,9-dimethyl-9,10-dihydroacridine (DMAC)</b> | -4.89 | -0.08 | 4.81 |
| <br><b>diphenylamine (DPA)</b>                      | -5.10 | -0.14 | 4.96 |
| <br><b>3,6-di-tert-butyl-9H-carbazole (tBuCz)</b>   | -5.23 | -0.61 | 4.62 |
| <br><b>9H-carbazole (Cz)</b>                        | -5.46 | -0.66 | 4.80 |
| <br><b>dibenzo[b,d]thiophene (DBT)</b>              | -5.83 | -0.96 | 4.86 |

**Table S4.** Calculated vertical  $\Delta E_{ST}$  (eV) for the investigated molecules in this work.

| <b>Mol.</b>          | <b>ISC</b>                     | <b><math>\Delta E_{ST}</math></b> |
|----------------------|--------------------------------|-----------------------------------|
|                      | T <sub>1</sub> -S <sub>1</sub> | <b>0.02</b>                       |
| <b>DPA-XAN-TRZ</b>   | T <sub>2</sub> -S <sub>1</sub> | <b>-0.04</b>                      |
|                      | T <sub>3</sub> -S <sub>1</sub> | <b>-0.08</b>                      |
|                      | T <sub>1</sub> -S <sub>1</sub> | <b>0.96</b>                       |
| <b>DPA-AN-TRZ</b>    | T <sub>2</sub> -S <sub>1</sub> | <b>0.11</b>                       |
|                      | T <sub>3</sub> -S <sub>1</sub> | <b>-0.23</b>                      |
|                      | T <sub>1</sub> -S <sub>1</sub> | <b>0.31</b>                       |
| <b>Cz-XAN-TRZ</b>    | T <sub>2</sub> -S <sub>1</sub> | <b>0.22</b>                       |
|                      | T <sub>3</sub> -S <sub>1</sub> | <b>0.12</b>                       |
|                      | T <sub>1</sub> -S <sub>1</sub> | <b>1.18</b>                       |
| <b>Cz-AN-TRZ</b>     | T <sub>2</sub> -S <sub>1</sub> | <b>0.16</b>                       |
|                      | T <sub>3</sub> -S <sub>1</sub> | <b>-0.09</b>                      |
|                      | T <sub>1</sub> -S <sub>1</sub> | <b>0.12</b>                       |
| <b>tBuCz-XAN-TRZ</b> | T <sub>2</sub> -S <sub>1</sub> | <b>0.08</b>                       |
|                      | T <sub>3</sub> -S <sub>1</sub> | <b>0.02</b>                       |
|                      | T <sub>1</sub> -S <sub>1</sub> | <b>1.06</b>                       |
| <b>tBuCz-AN-TRZ</b>  | T <sub>2</sub> -S <sub>1</sub> | <b>0.10</b>                       |
|                      | T <sub>3</sub> -S <sub>1</sub> | <b>-0.14</b>                      |

**Table S5.** Geometrical parameters (in Å or degree) for **tBuCz-XAN-TRZ** and **tBuCz-AN-TRZ** in their ground and excited states.

| <b>Mol.</b>          | <b>S<sub>0</sub></b> |              |              | <b>S<sub>1</sub></b> |              |              | <b>T<sub>1</sub></b> |              |              |
|----------------------|----------------------|--------------|--------------|----------------------|--------------|--------------|----------------------|--------------|--------------|
|                      | <i>d</i>             | $\alpha_1$   | $\alpha_2$   | <i>d</i>             | $\alpha_1$   | $\alpha_2$   | <i>d</i>             | $\alpha_1$   | $\alpha_2$   |
| <b>tBuCz-XAN-TRZ</b> | <b>4.70</b>          | <b>51.40</b> | <b>44.61</b> | <b>4.65</b>          | <b>56.17</b> | <b>43.37</b> | <b>4.65</b>          | <b>53.00</b> | <b>40.65</b> |
| <b>tBuCz-AN-TRZ</b>  | <b>5.02</b>          | <b>55.14</b> | <b>33.34</b> | <b>4.99</b>          | <b>57.87</b> | <b>22.65</b> | <b>4.98</b>          | <b>49.86</b> | <b>25.68</b> |

**Figure S1.** Optimized ground-state structures and dihedral angles of the investigated molecules and molecules with only the donor or acceptor connected with the bridge.

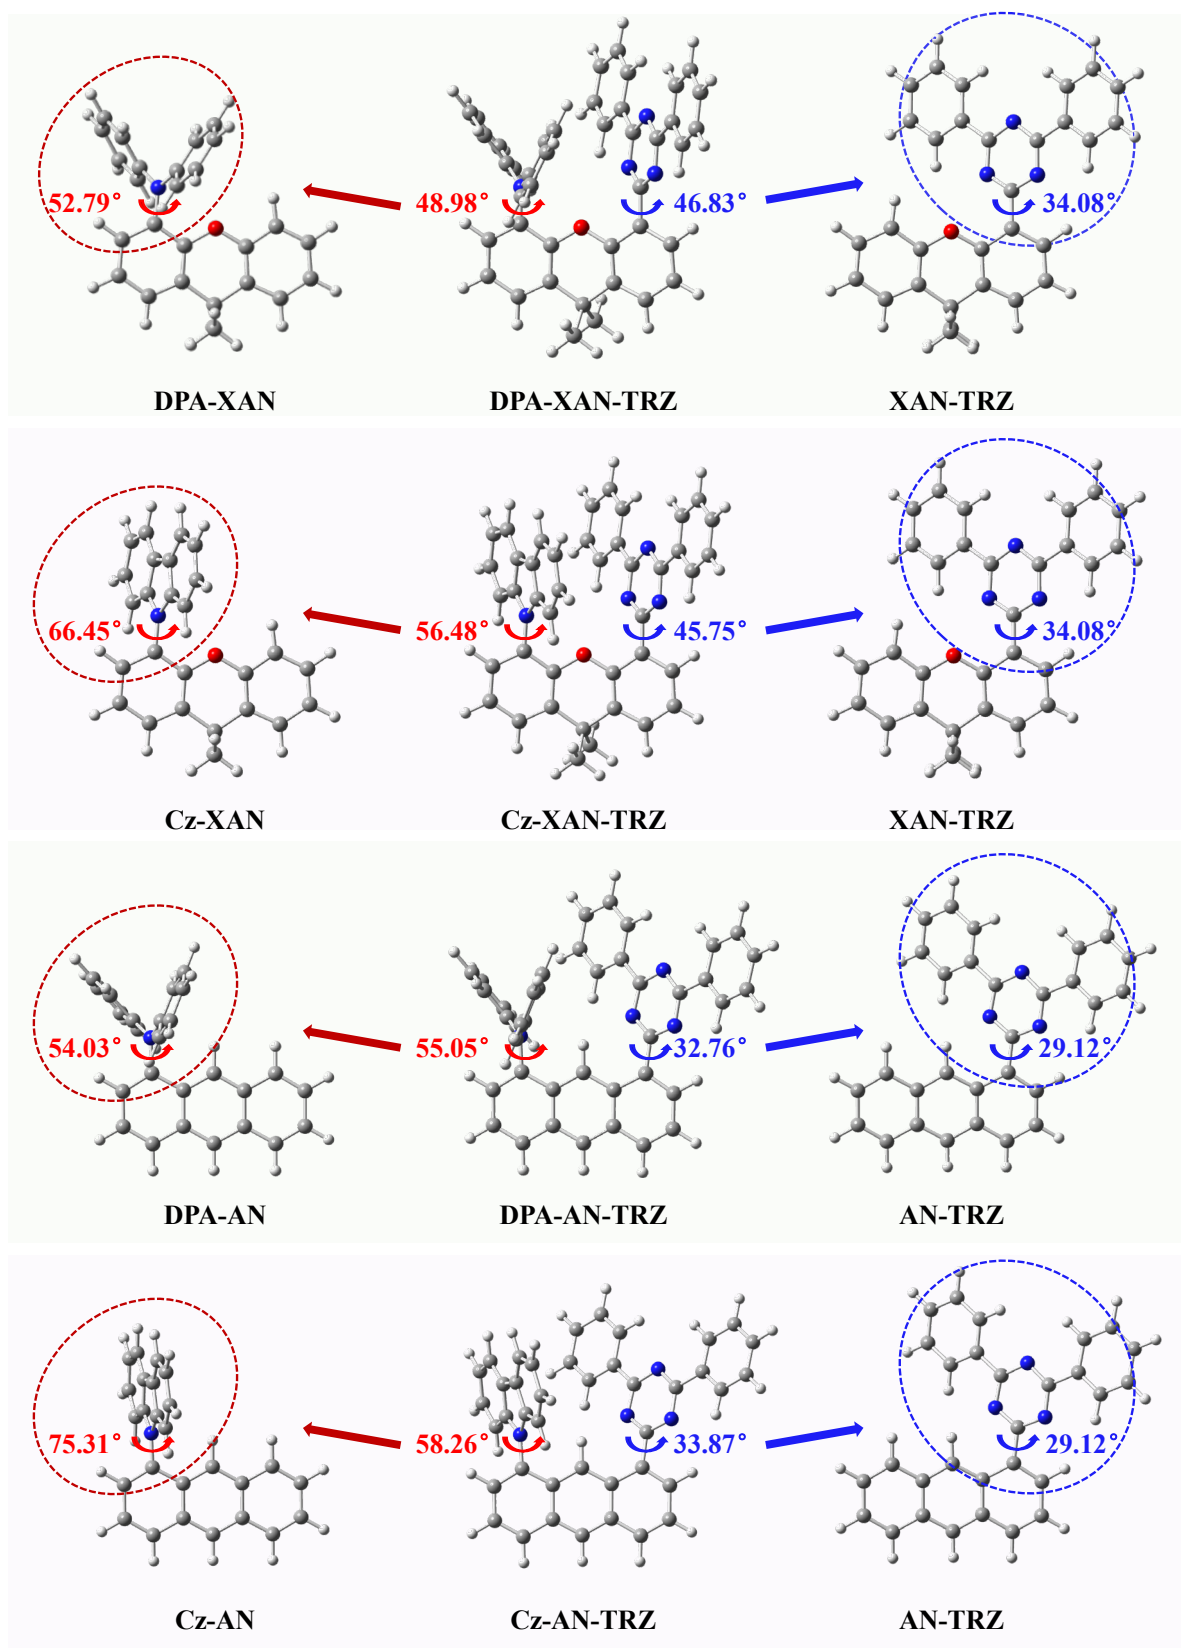

**Figure S2.** Structural changes between two states with their RMSDs and the corresponding relative energy levels ( $S_0$ ,  $S_1$ ,  $T_1$ , and  $T_2$  are shown in gray, red, blue, and green, respectively).

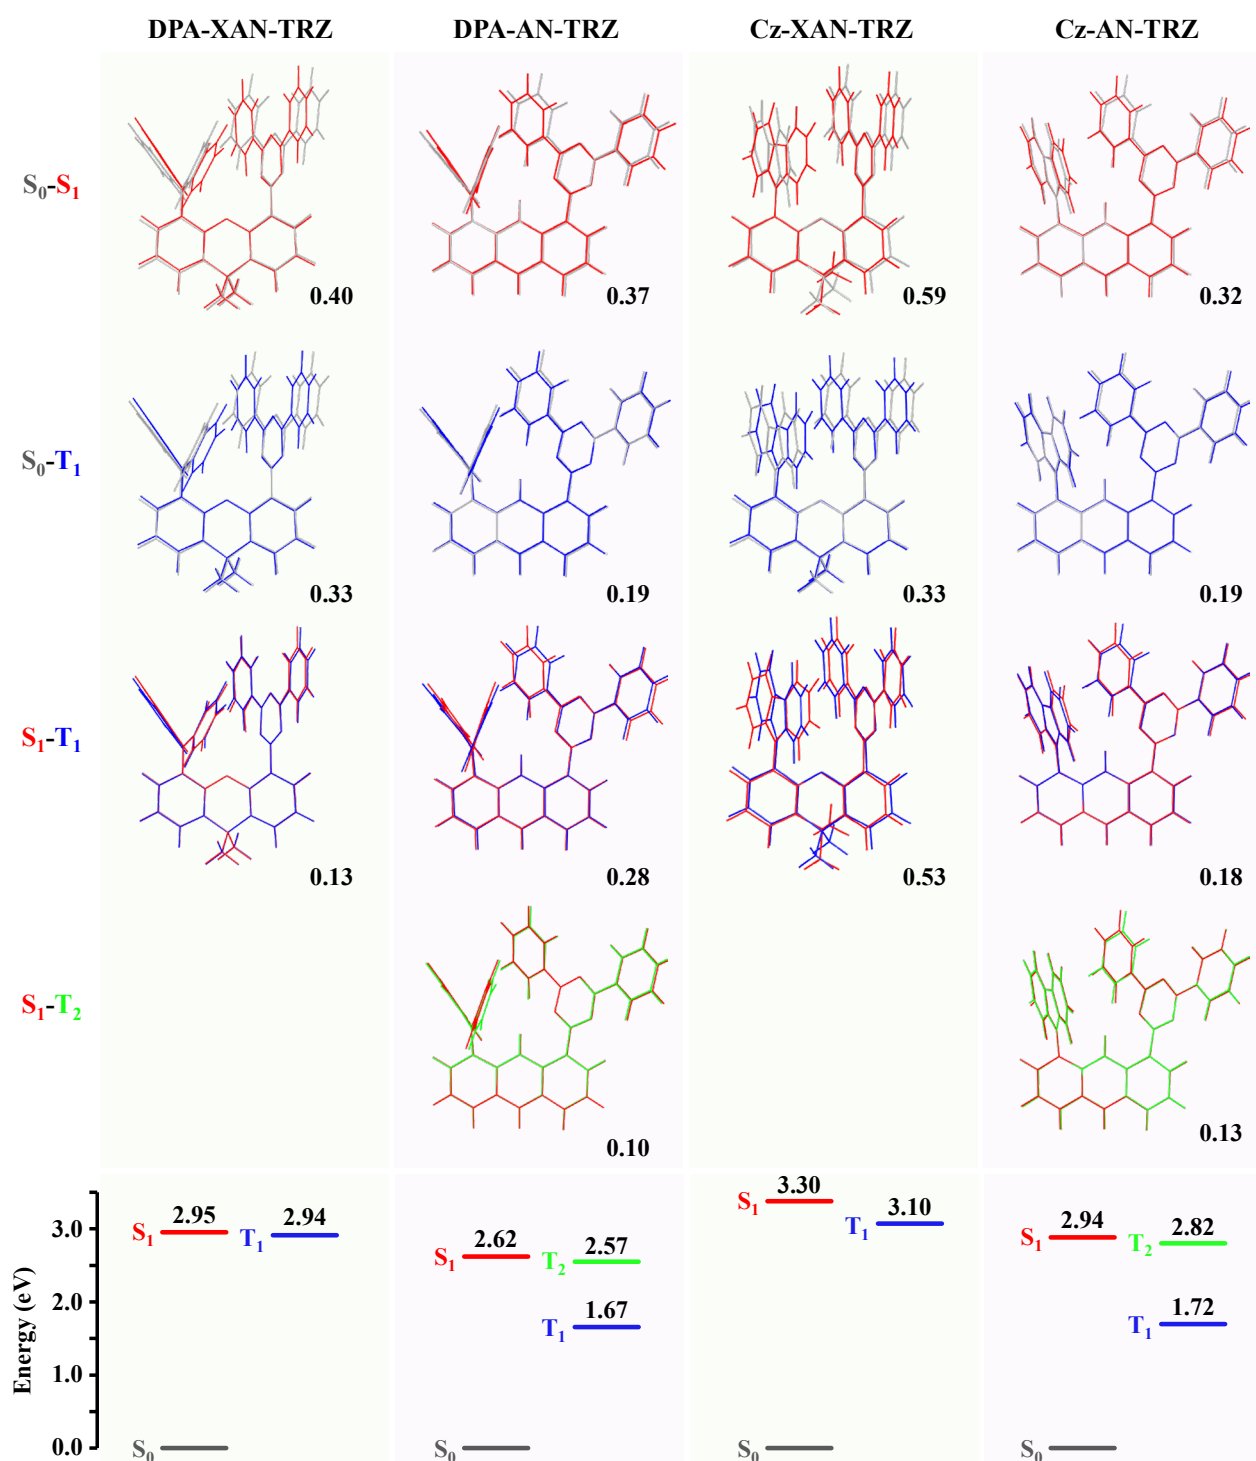



**Figure S3.** Chemical structures with **tBuCz** as the donor (a); HOMO and LUMO levels, spatial distributions, HOMO-LUMO energy gaps, and overlap integrals ( $\beta$ ) (b); IGMH isosurfaces and charge transfer amount ( $q$ ) from donor to acceptor (c); color-filled TDM maps of the singlet and triplet states (d); NTO analysis of the singlet and triplet states for **tBuCz-XAN-TRZ** and **tBuCz-AN-TRZ** molecules (e).

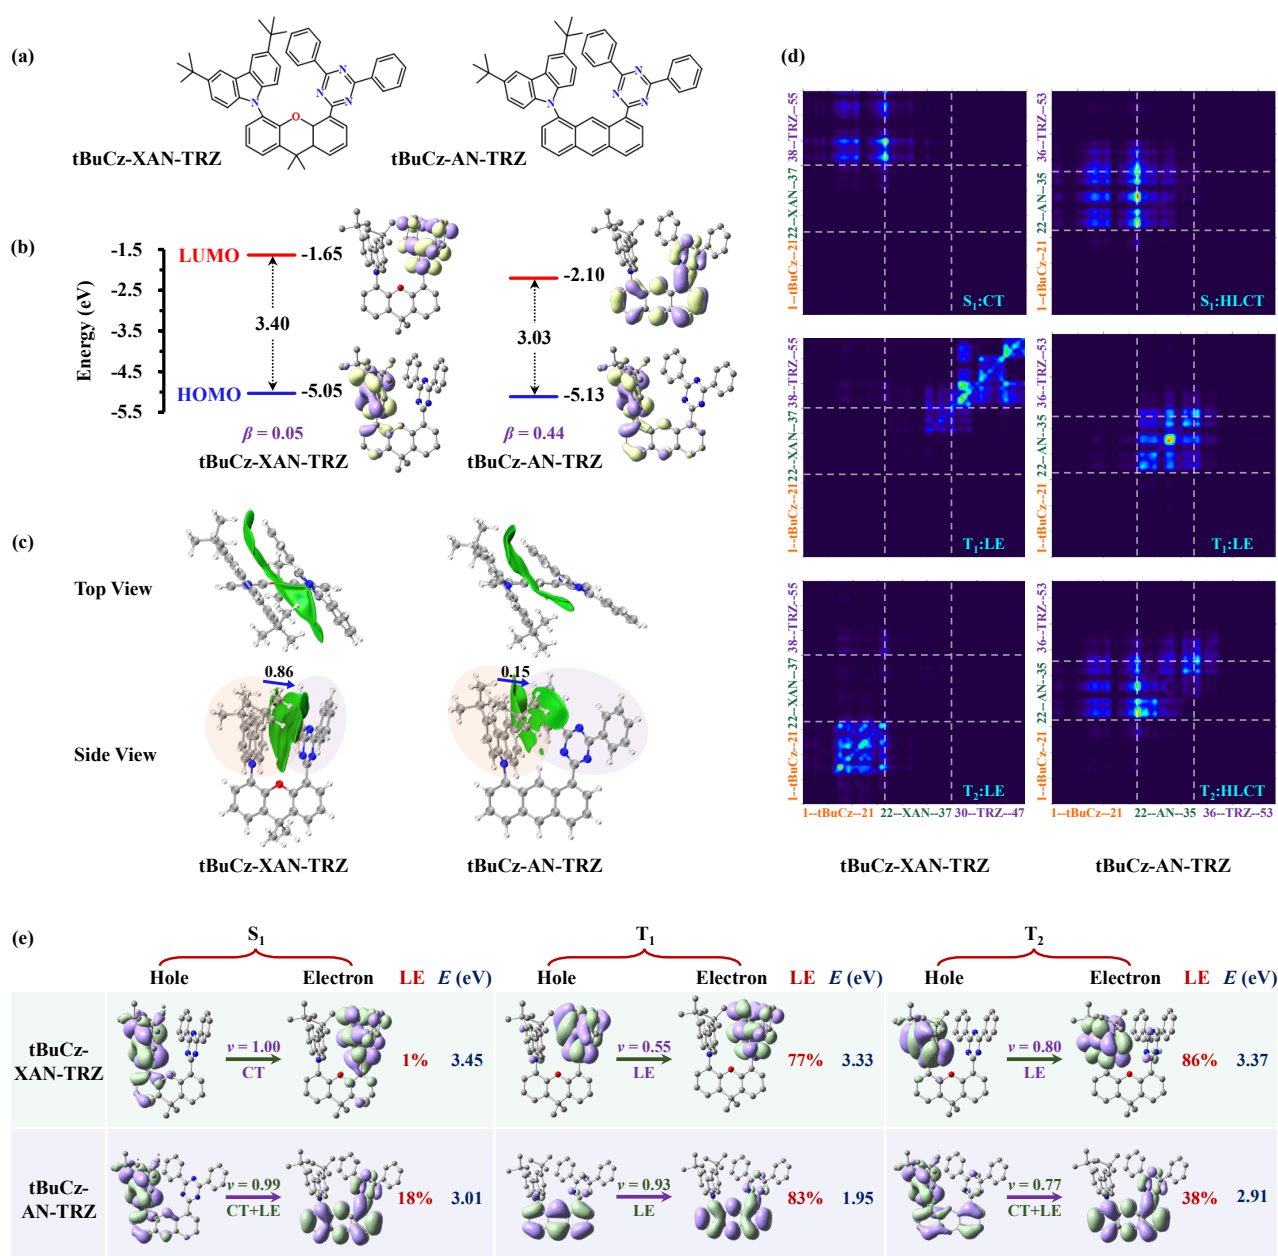

Supplement: d4tc02682a1.pdf [file d4tc02682a1.pdf]
